# Supplementary material for: Unique Transcriptome And Gene Expression Analysis of Flag Leaves of A Super-Hybrid Rice WFYT025
Source: Research Square preprint supplement (doi:10.21203/rs.3.rs-490906/v1), 2021-06-16

**Appendix A. Supplementary data**

**Supplementary Figures and Tables Captions**

**Supplementary Table S1.** Summary of reads quality control.

| Sample | Raw Data Read | Valid Data Read | Q20% | Q30% |
| --- | --- | --- | --- | --- |
| WFB1YE1 | 58067824 | 51827564 | 99.97 | 96.90 |
| WFB1YE2 | 55856602 | 50440052 | 99.97 | 96.42 |
| WFB1YE3 | 49093548 | 44323472 | 99.97 | 96.93 |
| WFB10YE1 | 55154582 | 48373938 | 99.97 | 96.89 |
| WFB10YE2 | 32577058 | 29566054 | 99.97 | 97.09 |
| WFB10YE3 | 57707296 | 53939666 | 99.97 | 96.82 |
| CH1YE1 | 47223226 | 43972676 | 99.97 | 96.90 |
| CH1YE2 | 50148850 | 47276426 | 99.97 | 96.38 |
| CH1YE3 | 59521130 | 56657380 | 99.97 | 96.43 |
| CH10YE1 | 49924152 | 47693980 | 99.96 | 95.71 |
| CH10YE2 | 56697348 | 53102578 | 99.96 | 96.23 |
| CH10YE3 | 51910576 | 49064482 | 99.96 | 96.10 |
| WFY1YE1 | 42521008 | 39987756 | 99.97 | 96.29 |
| WFY1YE2 | 42407886 | 38573182 | 99.97 | 95.61 |
| WFY1YE3 | 49399744 | 44670540 | 99.97 | 95.66 |
| WFY10YE1 | 59642288 | 54054670 | 99.96 | 96.48 |
| WFY10YE2 | 58586170 | 53489318 | 99.96 | 96.37 |
| WFY10YE3 | 59388316 | 57894440 | 99.95 | 95.66 |
| WFB1YM1 | 41877940 | 37466360 | 99.96 | 95.28 |
| WFB1YM2 | 37675788 | 34596514 | 99.96 | 95.32 |
| WFB1YM3 | 43931940 | 40412444 | 99.96 | 95.25 |
| WFB10YM1 | 55179068 | 48185880 | 99.96 | 96.55 |
| WFB10YM2 | 37529196 | 33435912 | 99.97 | 96.20 |
| WFB10YM3 | 36929212 | 32208332 | 99.96 | 95.35 |
| CH1YM1 | 37453408 | 31809752 | 99.96 | 95.95 |
| CH1YM2 | 49902748 | 44269166 | 99.96 | 96.03 |
| CH1YM3 | 39974474 | 34311360 | 99.96 | 95.72 |
| CH10YM1 | 42010238 | 36958032 | 99.97 | 95.77 |
| CH10YM2 | 48782678 | 43370946 | 99.96 | 96.03 |
| CH10YM3 | 49215802 | 43682886 | 99.96 | 96.08 |
| WFY1YM1 | 58915542 | 52942812 | 99.96 | 96.32 |
| WFY1YM2 | 35801982 | 31728748 | 99.96 | 95.16 |
| WFY1YM3 | 38811202 | 32672228 | 99.96 | 95.73 |
| WFY10YM1 | 45758222 | 39934752 | 99.96 | 95.85 |
| WFY10YM2 | 49112104 | 40312014 | 99.96 | 95.47 |
| WFY10YM3 | 41302046 | 36012804 | 99.96 | 95.36 |

**Supplementary Table S2.** Primers used in this study.

| Gene ID | Forward primer | Reverse primer |
| --- | --- | --- |
|  |  |  |
| *OS09G0555500* | GCAATCTGGGCGATATACGTGTG | TGTACCTCGACTTCGTTAGGTC |
| *OS04G0578400* | TGCCGATGACCGAGATGTTT | CATGCCGAACAGCGTAATCC |
| *OS03G0592500* | TATGGACCTGACCGTCCCAA | CTTCACCCCGTTCTTGGACA |
| *OS03G0856700* | CGGCTTCTTCCTGGTGGTTA | GTCGTTGCGCTGGAAGAATC |
| *OS04G0611800* | TACAAGAGGATTCGGCGTGG | CATCCCCATGGCAAGGCTAA |
| *OS01G0580500* | GGAGGTGAAGAGCTTCGTGT | AGTAGGTGGCCTCCCAGTC |
| *OS01G0656200* | CAGCAGGTGGCAGGGTTATC | GATACCACATCCCACAGCCC |
| *OS01G0841600* | CCTTCACTGGCGAGATCAGT | GGTCTCACCAATGCAAGCAA |
| *OS02G0171100* | TCGAGTGGCGAGAAGACAAA | CCCCAAGGAATATCTGCTGGA |
| *Os11g0171300* | TCCTTGCCATGGATGAGTCG | GAGACCTTGGCACCATGACT |
| *Os06g0133800* | GACGAGGTCATGCGGTACAA | GATGGCCTGGAGTCTTGCTT |
| *Os08g0434300* | AATTGCTGCCGAGGTTCTGA | CATGACCACCGACAACTGGA |

**Supplementary Fig. S1** Comparison of the log2 (FC) of 12 randomly selected transcripts using RNA-Seq and qRT-PCR. **A-C**: In the early rice environment, compare one day and ten days after flowering about CHT025, WFB and WFYT025, respectively. **D-F**: In the middle rice environment, compare one day and ten days after flowering about CHT025, WFB and WFYT025, respectively.

A.

B

C

D

E

F

**Supplementary Fig. S2** Gene ontology (GO) enrichment analysis of DEGs**(A)** GO enrichment analysis of DEGs on the first day and the tenth days under the environment of early rice in WFYT025. **(B)** GO enrichment analysis of DEGs on the first day and the tenth days under the environment of middle rice in CHT025. **(C)** GO enrichment analysis of DEGs on the first day and the tenth days under the environment of middle rice in WFB. **(D)** GO enrichment analysis of DEGs on the first day and the tenth days under the environment of middle rice in WFYT025.

A.
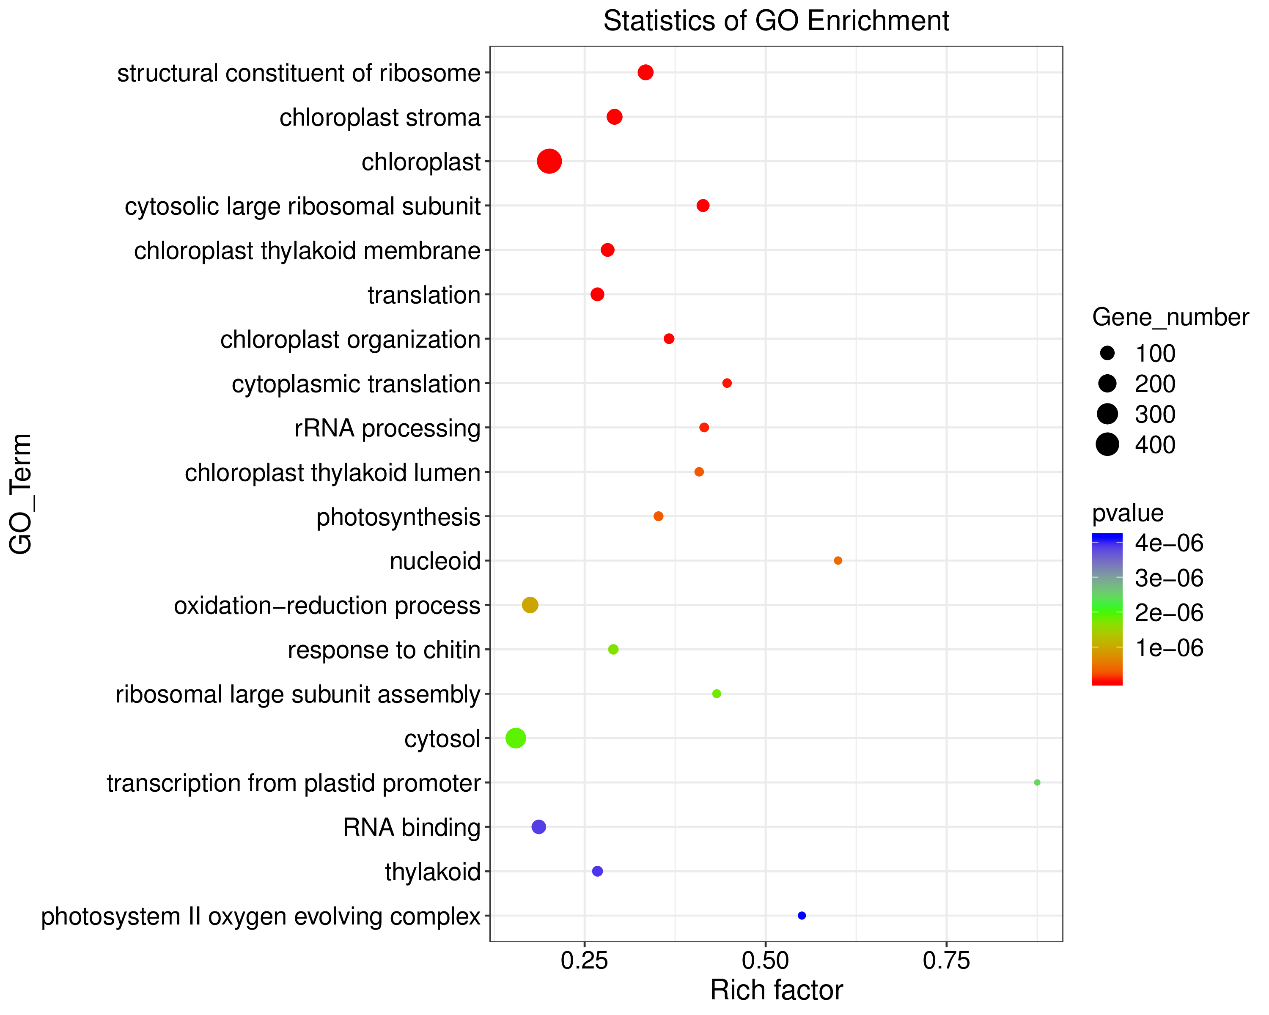


B
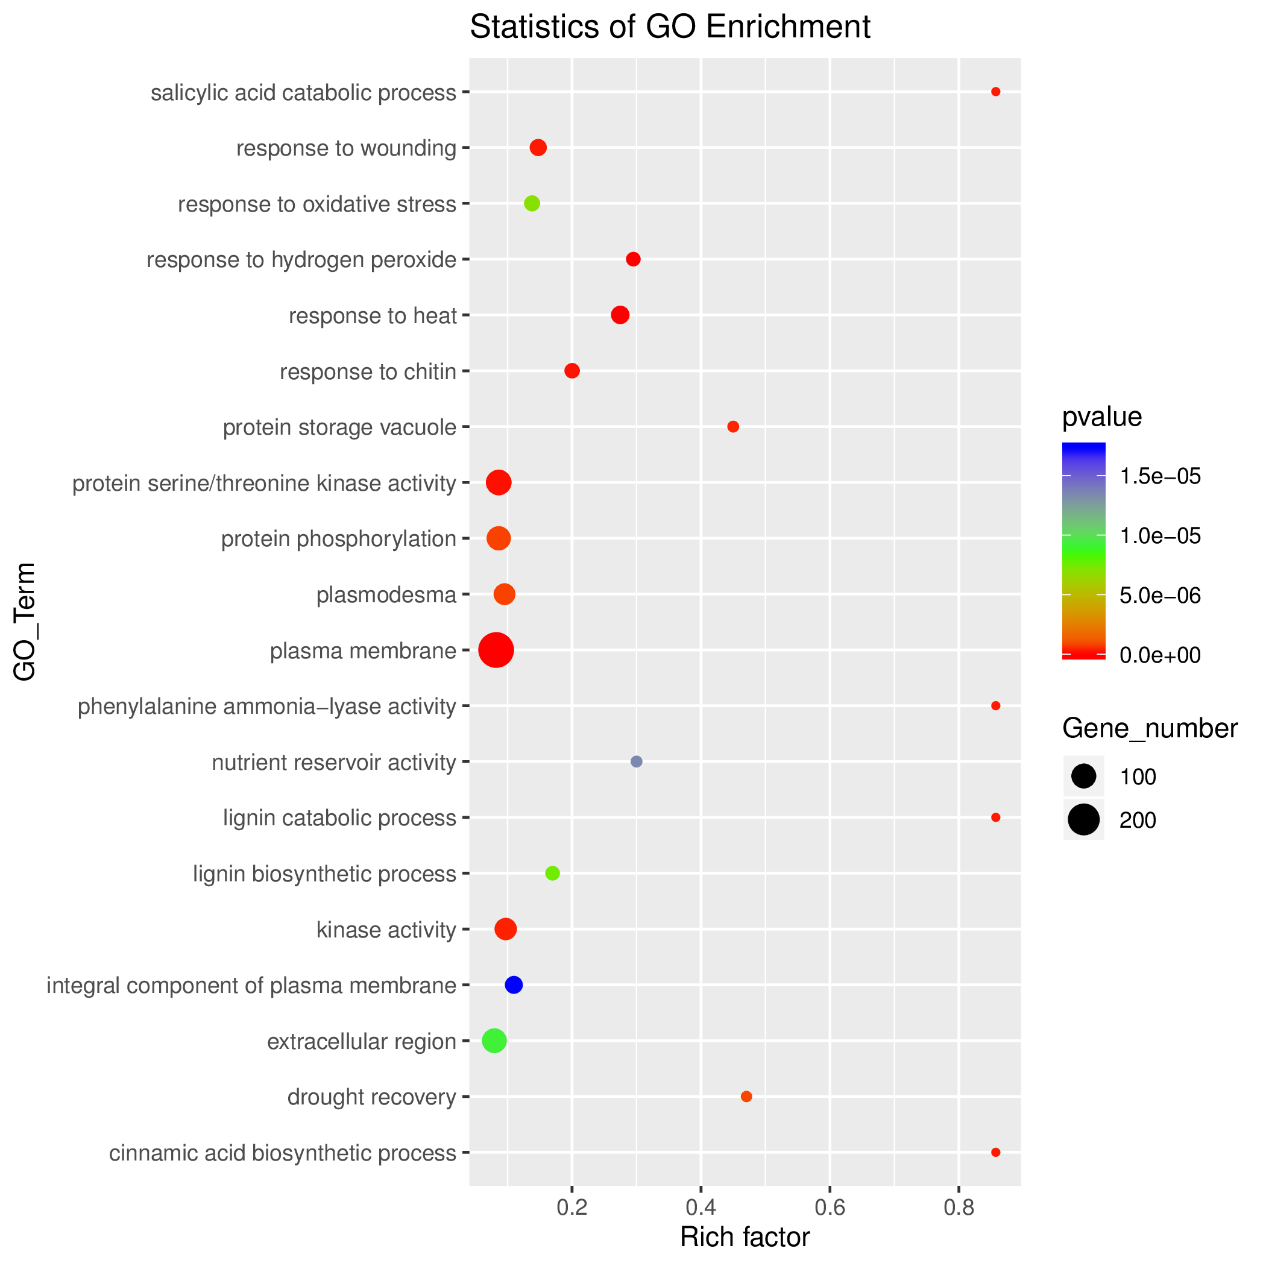


C


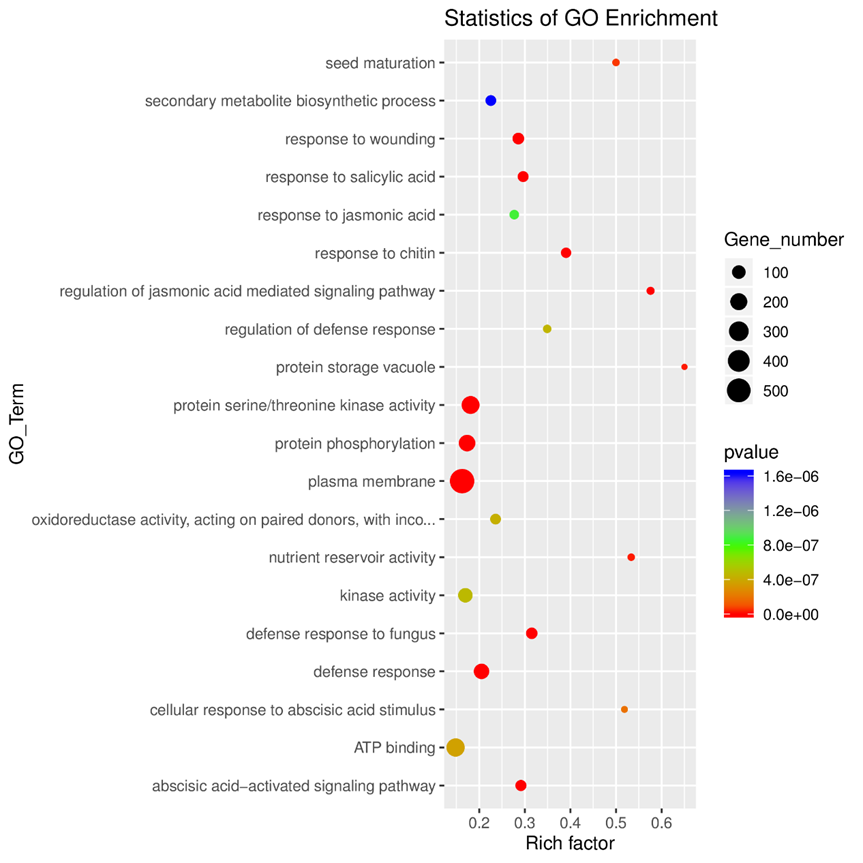


D
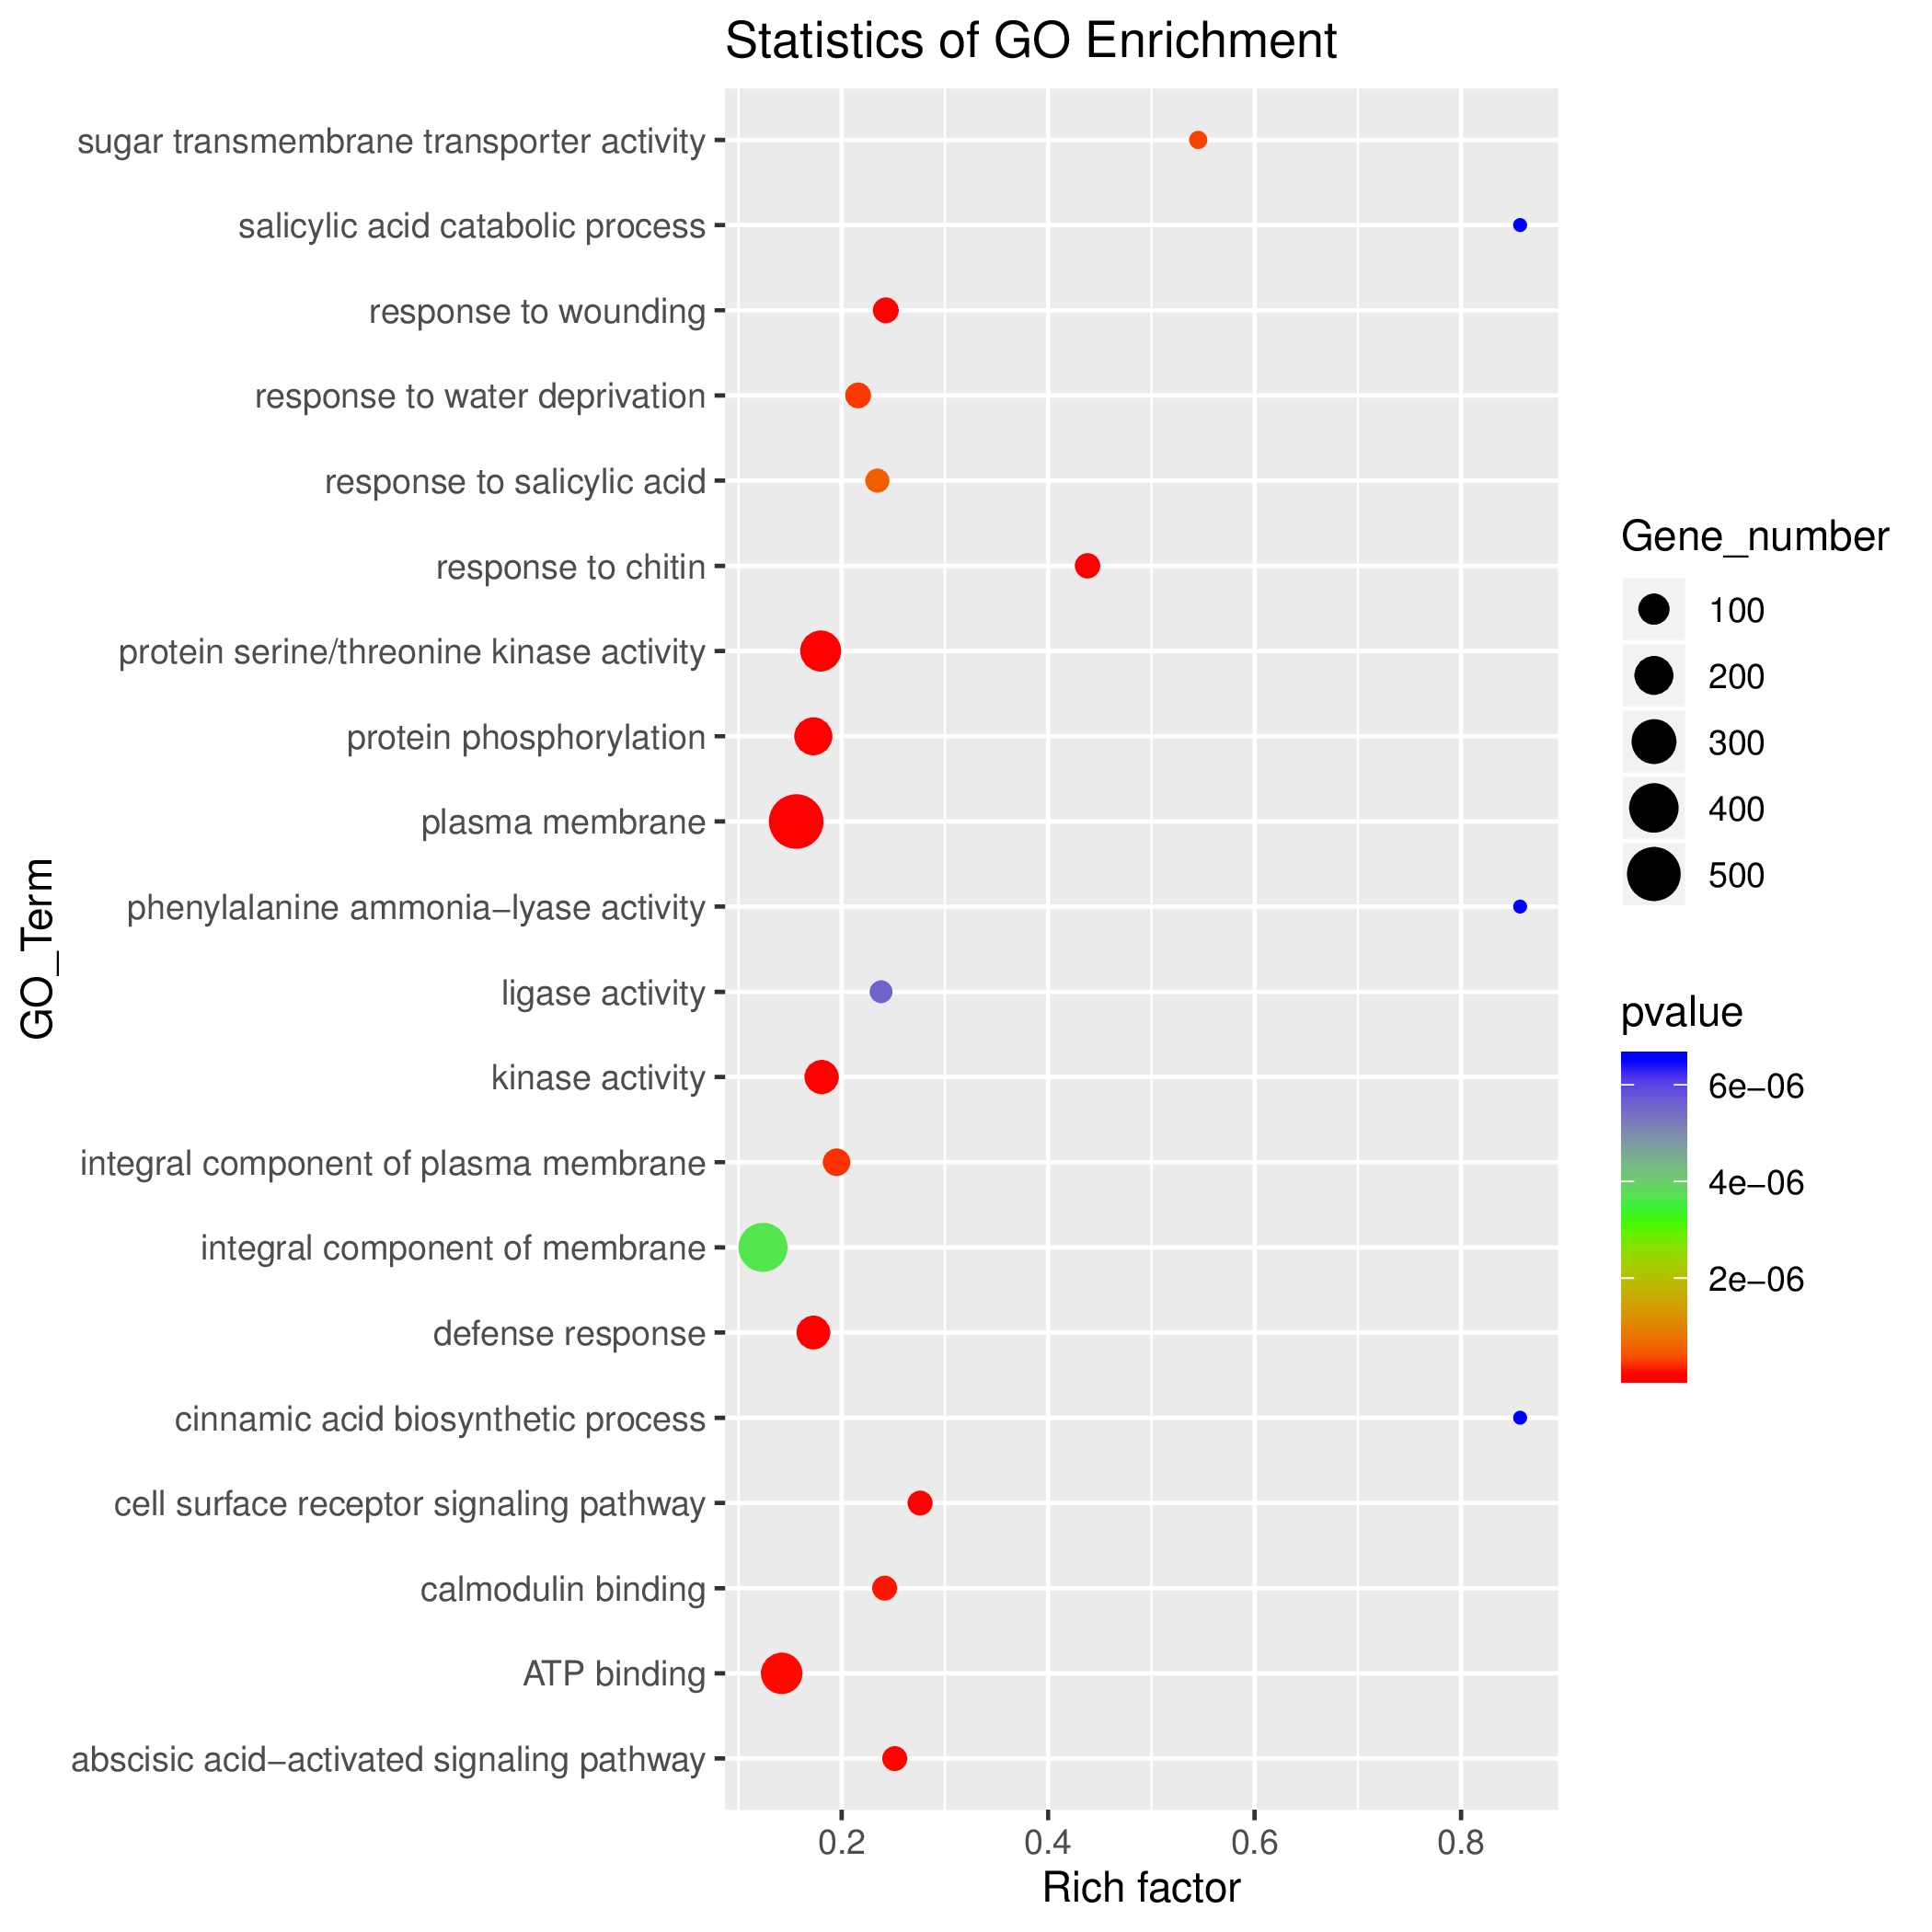


**Supplementary Fig. S3** KEGG analysis of DEGs between WFYT025 in the environment of early rice. That showed the top 20 most represented categories and the number of transcripts predicted to belong to each category.


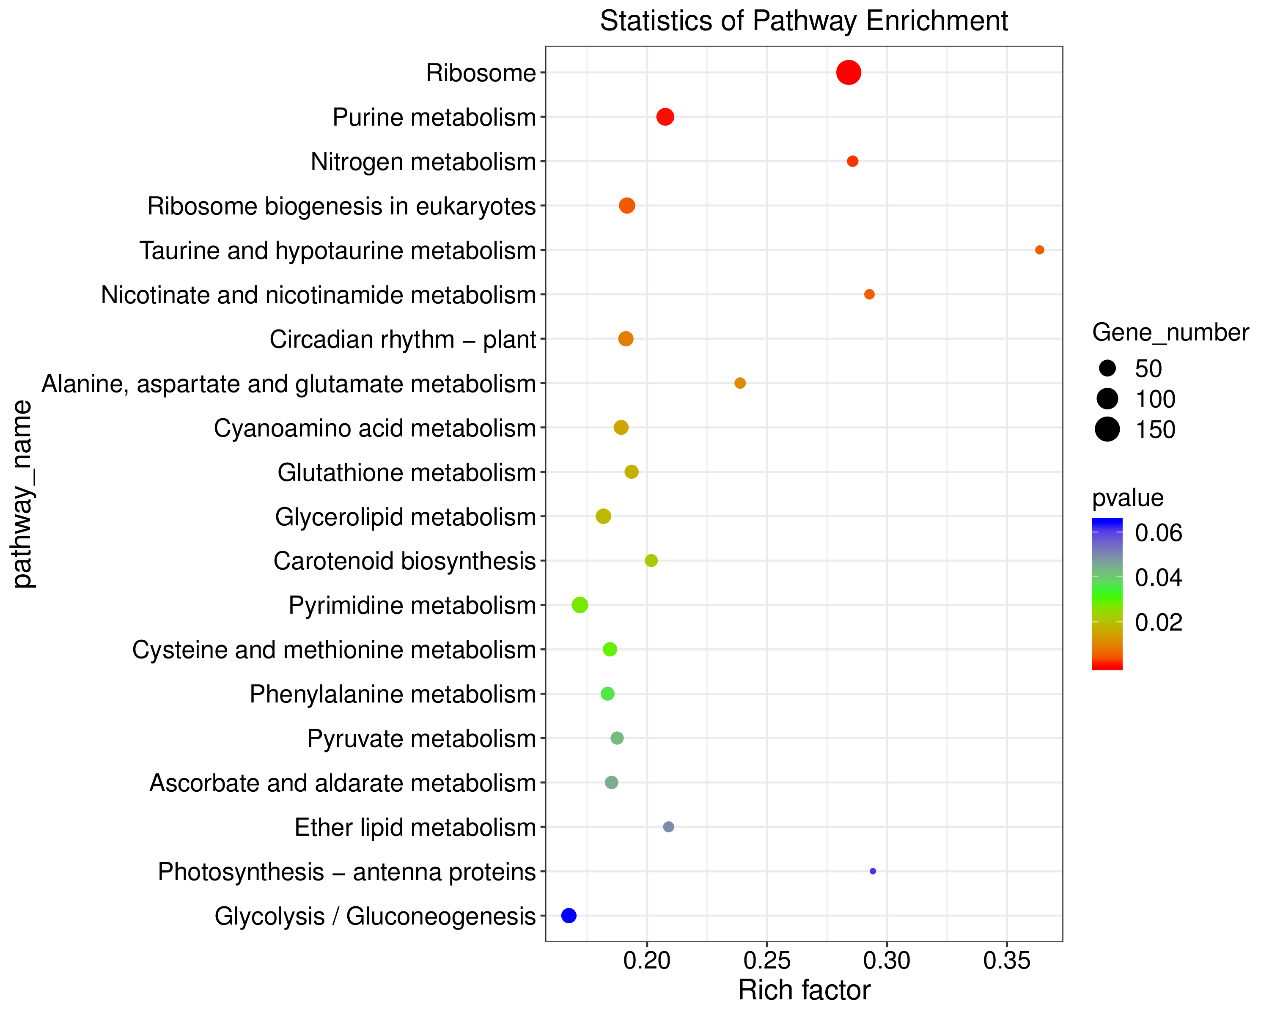


**Supplementary Fig. S4** Correlation between gene expression profile of co-expression module and three phenotypic data (Thousand grain weight; Length; Width)


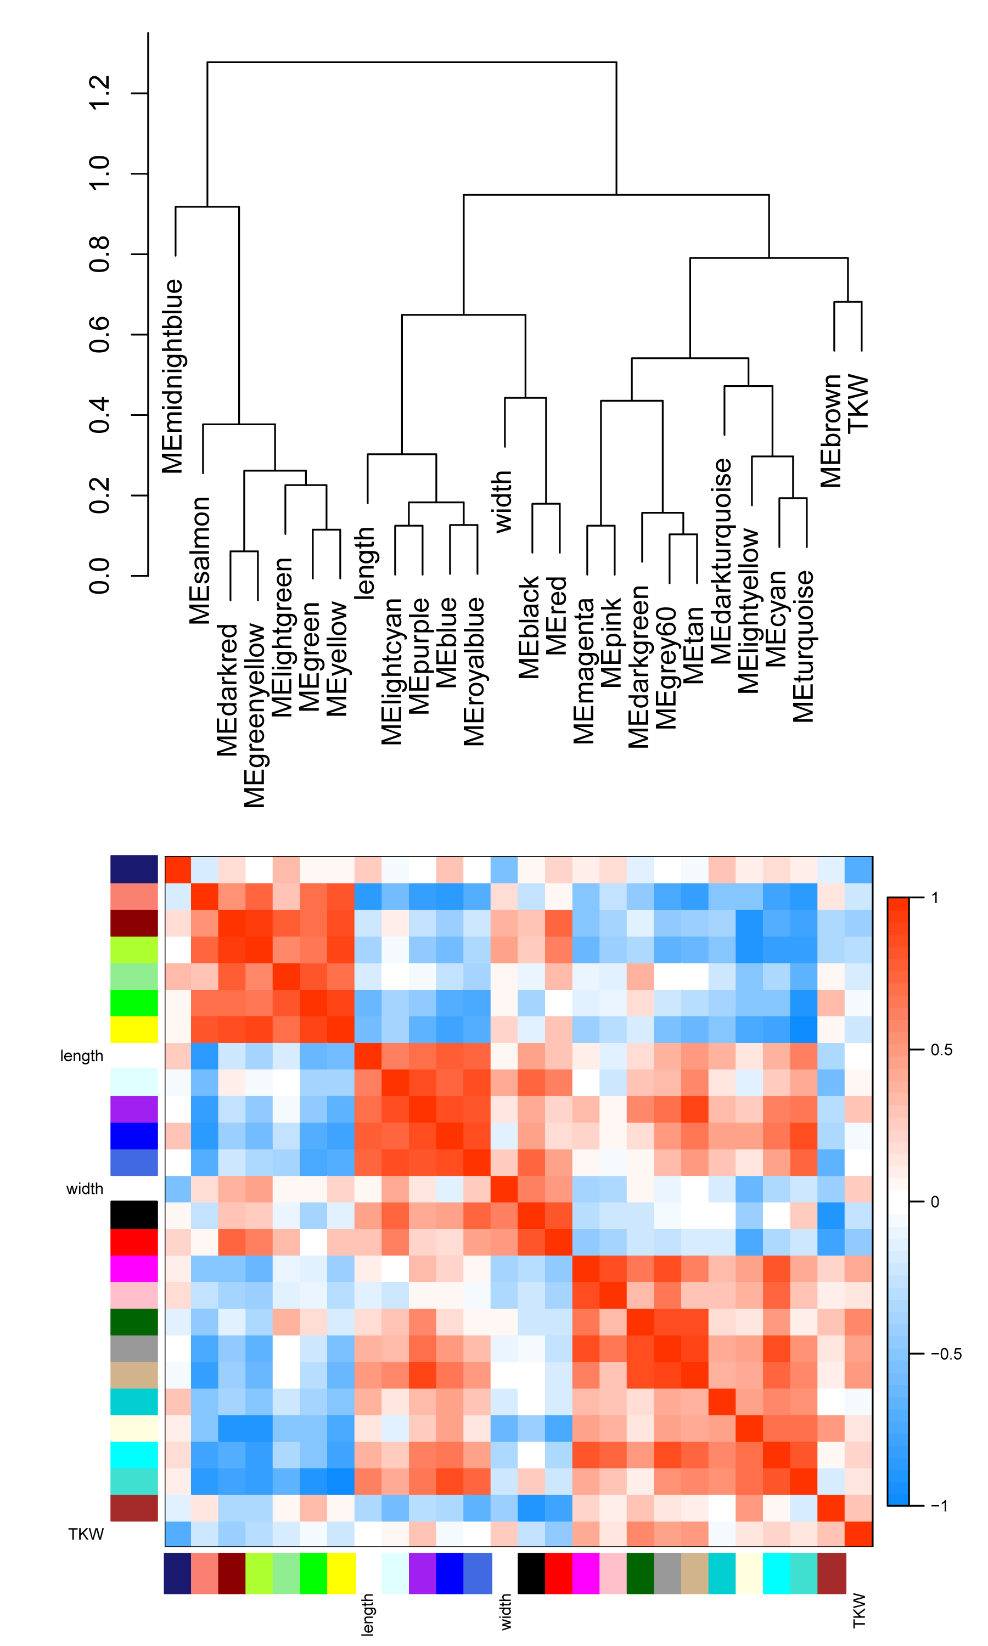


**Supplementary Fig. S5** Is the overall gene expression profile of the co-expression module MidnightBlue, which has the highest correlation with TKW.
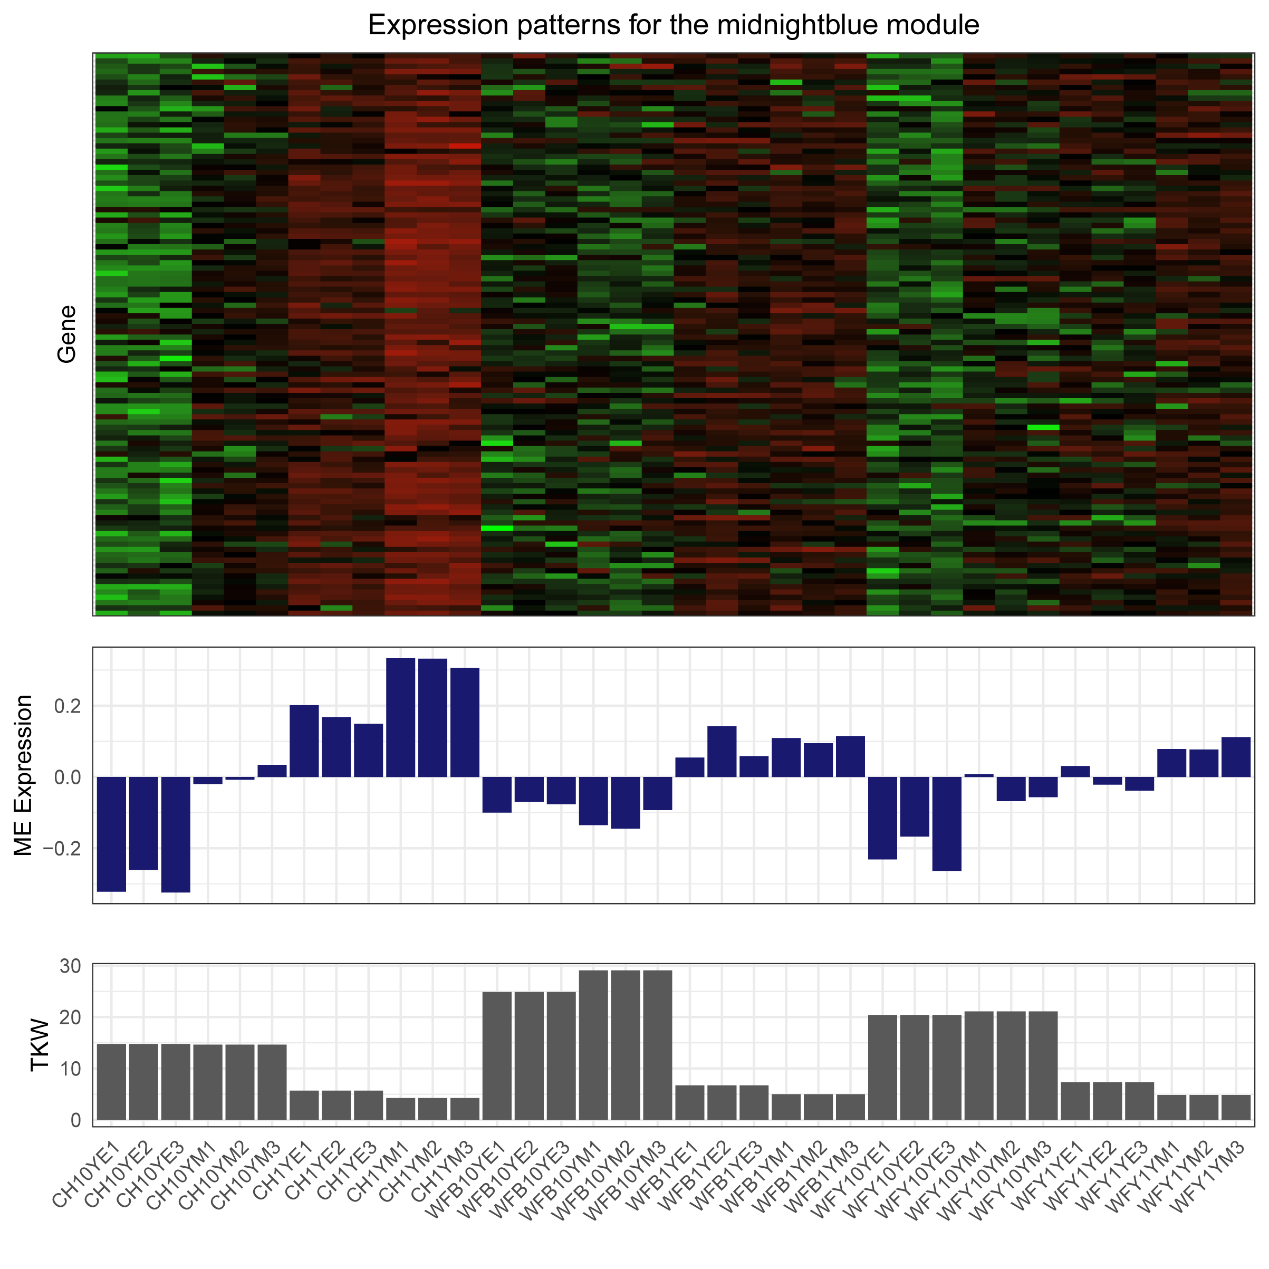

Supplement: Supplementary file 1 [file f16ebfbcd4ffa5d65576df48.docx]
